# Supplementary material
Source: PubMed Central journal article supplement (PMC2756752)
Supplement: NIHMS59123-supplement-supplement_1.pdf [file NIHMS59123-supplement-supplement_1.pdf]

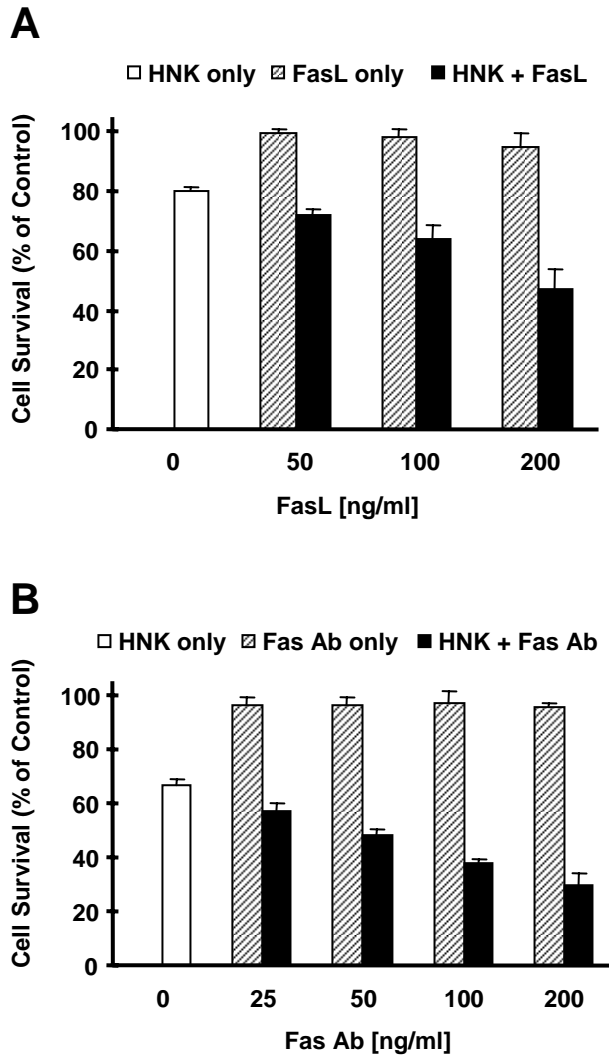

**Fig. S1. HNK enhances Fas-induced apoptosis.** H226 cells were seeded in 96-well plates and treated on the second day with 30  $\mu$ M HNK alone, the indicated concentrations of Fas ligand (FasL)(A) or Fas antibody (Ab) (B) alone, or their combinations. Cell numbers were estimated after 24 h treatment using the SRB assay. Columns, means of four replicates; Bars, SDs.

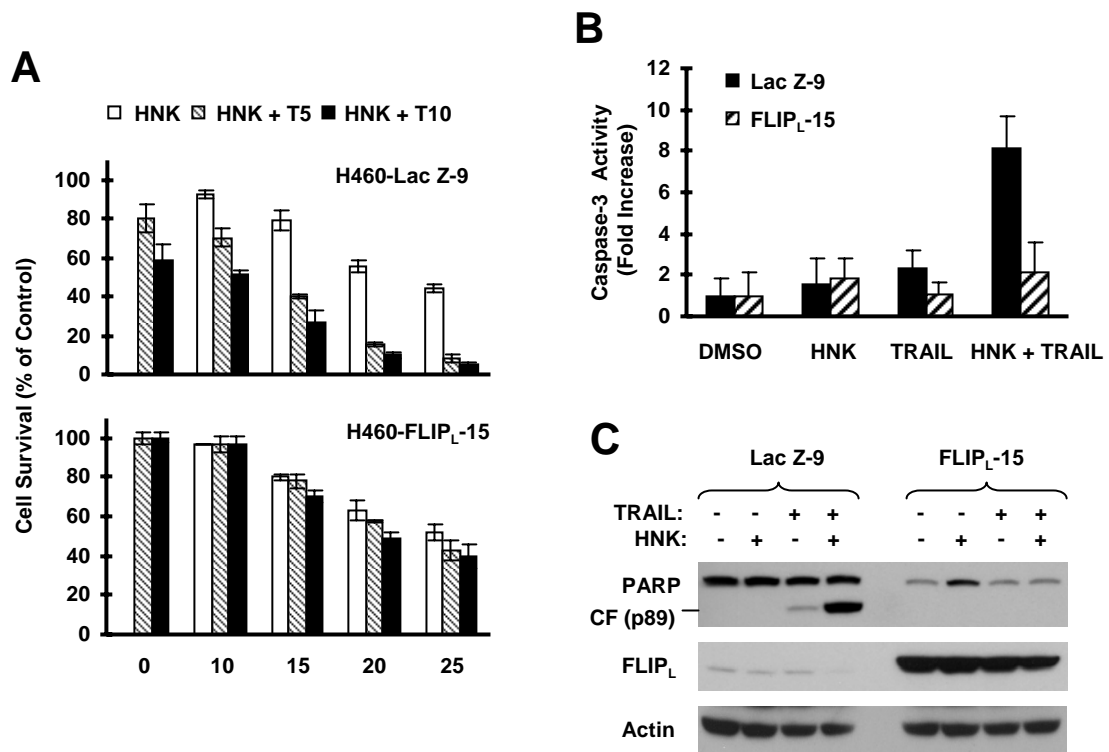

**Fig. S2. Enforced expression of ectopic c-FLIP confers resistance to induction of apoptosis by the combination of HNK and TRAIL in H460 cells.** *A*, The indicated transfectants were seeded in 96-well plates and treated with the indicated concentrations of HNK alone, 5 ng/ml TRAIL (T5) or 10 ng/ml TRAIL (T10) alone, or individual combination of HNK with TRAIL. After 24 h, the cells were subjected to the SRB assay for measurement of cell survival. Data are means of four replicate determinations. Bars,  $\pm$  SDs. *B* and *C*, The indicated transfectants were treated with DMSO, 20  $\mu$ M HNK alone, 5 ng/ml TRAIL alone, or HNK plus TRAIL for 24 h and then subjected to preparation of whole-cell protein lysates for measuring caspase-3 activity using fluorometric assay (*B*) or for detecting PARP cleavage and c-FLIP using Western blotting (*C*).

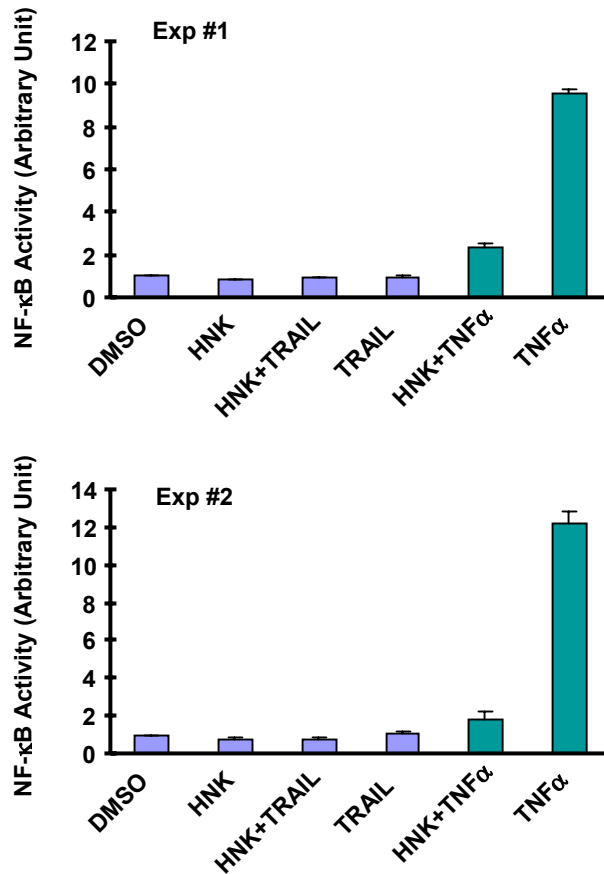

**Fig. S3. Effects of honokiol (HNK), TRAIL or their combination on NF- $\kappa$ B activity.** A549/NF $\kappa$ B-luc cells were treated with 30  $\mu$ M HNK alone, 20 ng/ml TRAIL alone, 10 ng/ml TNF $\alpha$  alone, or HNK in combination with TRAIL or TNF $\alpha$ . After 4 h, the cells were harvested, lysed and subjected to luciferase activity assay. The results from two independent experiments were shown. Columns, means of triplicate treatments. Bars, SDs.
